# Supplementary material for: Lysosomal degradation products induce Coxiella burnetii virulence
Source: PubMed Central journal article supplement — Proc Natl Acad Sci U S A. 2020 Mar 9;117(12):6801–10. doi: 10.1073/pnas.1921344117 (PMC7104363; doi:10.1073/pnas.1921344117), 2020-03-09
Supplement: pnas.1921344117.sapp.pdf [file pnas.1921344117.sapp.pdf]

## Supplementary Information for

### **Lysosomal degradation products induce *Coxiella burnetii* virulence**

Patrice Newton, David R Thomas, Shawna CO Reed, Bangyan Xu, Nicole Lau, Sze Ying Ong, Shivani Pasricha, Piyush B Madhamshettiwar, Laura E Edgington-Mitchell, Kaylene J Simpson, Craig R Roy and Hayley J Newton

Corresponding Author: Hayley J Newton  
Email: [hnewton@unimelb.edu.au](mailto:hnewton@unimelb.edu.au)

#### **This PDF file includes:**

SI Materials and Methods  
Figs. S1 to S3  
Tables S1 to S4

#### **Other supplementary materials for this manuscript include the following:**

Datasets S1 to S6

## SI Materials and Methods

### Bioinformatic analysis of siRNA screen data

Data analysis was automated using a custom R script which combined and analysed the CCF2-AM fluorescence (translocation ratio) and DRAQ5™ (cell viability) raw data files to generate a summarised report spreadsheet. Translocation ratio and cell viability values were normalized to the average of the siOTP-NT control readout per plate. The experimental robustness was evaluated for each screened plate using the Z' factor calculation (1), comparing the negative, positive and cell death control for both translocation ratio and cell viability. siRNA transfections that resulted in >50% average reduction in cell viability compared to siOTP-NT were scored as toxic and excluded from further analyses. Robust z-scores utilising the median and median absolute deviation (MAD) of all siOTP-NT-normalized sample values for the translocation ratio were generated across all sample wells and averaged per duplicate plate pair. Robust z-score = (sample value-sample median)/sample median absolute deviation were used as the bio-identification method (1) of which  $Z \leq -2$  or  $Z \geq 2$  were considered statistically significant. In the deconvolution validation screen, siRNA targets were confirmed by approximate reproduction of the translocation ratio in the primary screen and a decrease in effector translocation by 20% compared to siOTP-NT. The PANTHER Overrepresentation Test (Version 14.1; released 20190312) was used to classify the validated genes (2).

### Manual siRNA transfection

HeLa cells (3920 cells/well or 19600 cells/well) were reverse transfected in 96-well and 24-well plates, respectively, with siGENOME SMARTpool siRNAs using DF1 diluted in reduced serum media for 72 h. A media change was performed 24 h post-transfection.

### BlaM translocation assay

To quantify translocation of BlaM-constructs, cells were seeded into black-walled, clear bottom 96-well plates (Corning). For siRNA-treated cells, HeLa cells were seeded as described above and infected 72 h post-transfection with *C. burnetii* pBlaM-MceA or *C. burnetii* pBlaM-Cig2 at a MOI of 300. Cells were infected for 24 h, loaded with CCF2-AM using the LiveBLAzer™ FRET B/G Loading Kit (Invitrogen) and 0.1M probenecid. Translocation was measured using the CLARIOstar Microplate Reader (BMG LABTECH) and the ratio of 450 nm to 520 nm was calculated. Cells were fixed with 4% PFA for 15 min and cell viability was ascertained using DRAQ5™. Quantification of cell nuclei per well was performed from 9 fields using a 10X long WD objective on the Operetta High-Content Imaging System (Perkin Elmer) and the Find Nuclei Method B program using Harmony High Content Imaging and Analysis Software (Perkin Elmer). To induce starvation conditions, infected cells were treated 20 h post-infection with HBSS for 4 h and then subsequently loaded with the CCF2-AM fluorescent dye as described.

### Real-time PCR quantification of gene silencing

Duplicate wells of siRNA treated cells seeded in 24-well plates were used to ascertain RNA silencing efficiency. At the desired time points, HeLa cells were lysed and RNA was extracted using TRIsure™ (Bioline). Quantitative Real-time PCR was performed using SsoAdvanced™ Universal SYBR® Green Supermix (Bio-Rad) from cDNA generated using the iScript™ cDNA Synthesis Kit (BioRad) following DNase treatment (Ambion; Life Technologies). The oligonucleotide pairs used are listed in SI Appendix Table S4. Real Time PCR was performed using an Mx3005P QPCR System (Agilent Technologies) and gene expression levels were normalized to 18S rRNA expression.

### Western blot analysis

Immunoblot analysis was performed as previously described (3). Membranes were blocked using 5% skim milk in Tris-buffered saline containing 0.1% Tween-20 (TBST). Primary antibodies were diluted in either 5% Bovine Serum Albumin (BSA) or skim milk in TBST and used at the following concentrations overnight at 4°C: anti-β-actin (1:5000; Sigma), anti-LRP1 (EPR3724) (1:5000; Abcam), anti-CD-M6PR (H-7) (1:100; Santa Cruz Biotechnology), anti-TPP1 (CLN2) (D-11) (1:100; Santa Cruz Biotechnology). Anti-mouse-HRP and anti-rabbit-HRP (Perkin Elmer) was used at 1:3000 and detected with Clarity™ Western ECL Blotting substrate (Bio-Rad) and the Amersham Imager 600 (GE Healthcare).

### *C. burnetii* infections

The Quant-iT PicoGreen double stranded DNA assay kit (Thermo Fisher Scientific) was used to quantify axenically grown *C. burnetii* strains (4). Cells were infected with the appropriate MOI of *C. burnetii* and incubated for 4 h at 37°C with 5% CO<sub>2</sub>, washed once with PBS and either fixed (bacterial entry), incubated for a further 2 h in DMEM containing 5% FCS, washed once with PBS and fixed (LAMP-1 association), or incubated in DMEM containing 5% FCS until the desired time at which point samples were either fixed for microscopy or lysed with H<sub>2</sub>O and collected for *C. burnetii* quantification (intracellular replication). Lysed samples were pelleted and re-suspended in 100 µl of H<sub>2</sub>O and gDNA extracted using the Quick-DNA™ Miniprep kit (Zymo Research). The number of *C. burnetii* genomes was quantified by qPCR using *ompA*-specific primers (5, 6).

### Immunofluorescence and microscopy

Infected cells were fixed with 4% PFA for 15 min at appropriate time points. To discriminate between extracellular and intracellular bacteria differential staining was performed. Fixed samples were blocked in PBS containing 2% BSA (blocking buffer) prior to staining with mouse anti-*C. burnetii* (1:1000, in-house sera) followed by Alexa Fluor 488-conjugated anti-mouse antibodies (1:2000 in blocking buffer, Invitrogen). Cells were washed and fixed again before being permeabilised with PBS containing 0.1% Triton X-100 and blocked with blocking buffer. Total bacteria were stained using rabbit anti-*C. burnetii* (1:10000) followed by Alexa Fluor 568-conjugated anti-rabbit antibodies (1:2000, Invitrogen). DNA was stained with 4',6'-diamidino-2-phenylindole (DAPI)

diluted 1:10000 in PBS. Coverslips were mounted onto glass slides using ProLong Gold antifade reagent (Thermo Fisher Scientific) and quantification was performed with a Leica DMI4000b inverted microscope.

For LAMP-1 staining, fixed samples were blocked and permeabilised using blocking buffer containing 0.05% saponin. Samples were co-immunostained using mouse anti-LAMP-1 H4A3-C (1:200, DSHB) and rabbit anti-*C. burnetii* (1:10000) followed by secondary antibodies (1:2000). DNA was stained using DAPI and coverslips mounted as above. LAMP-1 association was quantified using a Leica DMI4000b inverted microscope and CCV area was determined using images acquired on a Zeiss LSM700 confocal laser scanning microscope and processed with ImageJ software.

#### Altered pH and media composition analysis

Stationary phase (6-7 day) cultures of luciferase-expressing *C. burnetii* were diluted to  $1 \times 10^7$  genome equivalents (GE) in 96-well black clear-bottomed tissue culture plates (Corning) in 0.1 ml of fresh ACCM-2 medium with pH adjusted from pH 4.2 to 7.2 using HCl or NaOH. 48 h later, light production was measured by a TECAN Infinite M1000 with 500 ms integration time. For altered medium compositions, ACCM-2 was freshly prepared with components missing or additional salts and cations as indicated.  $5 \times 10^6$  GE of stationary phase culture was diluted into 0.15 ml medium and light production was measured 48 h later.

### DQ-BSA assay

HeLa cells were reverse transfected with siRNA into black-walled, clear-bottomed 96-well plates. 72 h post-transfection, media was replaced with DMEM containing 10% FCS and 10 µg/ml DQ Green BSA and incubated at 37°C in 5% CO<sub>2</sub> for 1 h. After incubation, wells were washed with PBS and the media replaced with 100 µl of HBSS. Lysosomal protease activity was measured using the CLARIOstar Microplate Reader at 495 nm excitation, 525 nm emission every 5 min for 2 h. The slope of the range (0-120 min) was used for analysis. Chloroquine (50µg/ml) was added 1 h prior to the addition of DQ Green BSA, when required, and remained present throughout the experiment.

### RNA-seq analysis

Transcript abundances for each sample were bioinformatically quantified using kallisto (7) against a reference transcriptome (*C. burnetii* RSA 493; Accession Number AE016828.3). Differential expression analysis was performed using DESeq2 (8). After data normalisation, volcano plots (curated using Excel) were used to visualise log<sub>2</sub>(fold-change) expression data against the false discovery rate (FDR, DEseq-PADJ) and a 5% false discovery rate (FDR) cut-off was set (SI Appendix, Fig S3). Samples were omitted from further analysis if the log<sub>2</sub>(fold-change) was < 1 and > -1. The differences in gene expression profiles found in this study were compared with that of Beare *et al.* (9) using the online platform, Venny (10). Heatmaps were created using MultiexperimentViewer (MeV), version 4.8.1 (11).

### Quantification and Statistical Analysis

All graphs show mean  $\pm$  SEM. For comparisons between two groups an unpaired, two-tailed t-test was used. For comparisons between multiple groups either a one-way ANOVA or two-way ANOVA followed by Dunnett post-test was used as appropriate. Prism7 (GraphPad Software, Inc.) was used to perform statistical analyses, with p values less than 0.05 considered significant. Quantification of bacterial entry, LAMP-1 association and CCV area were performed blinded.



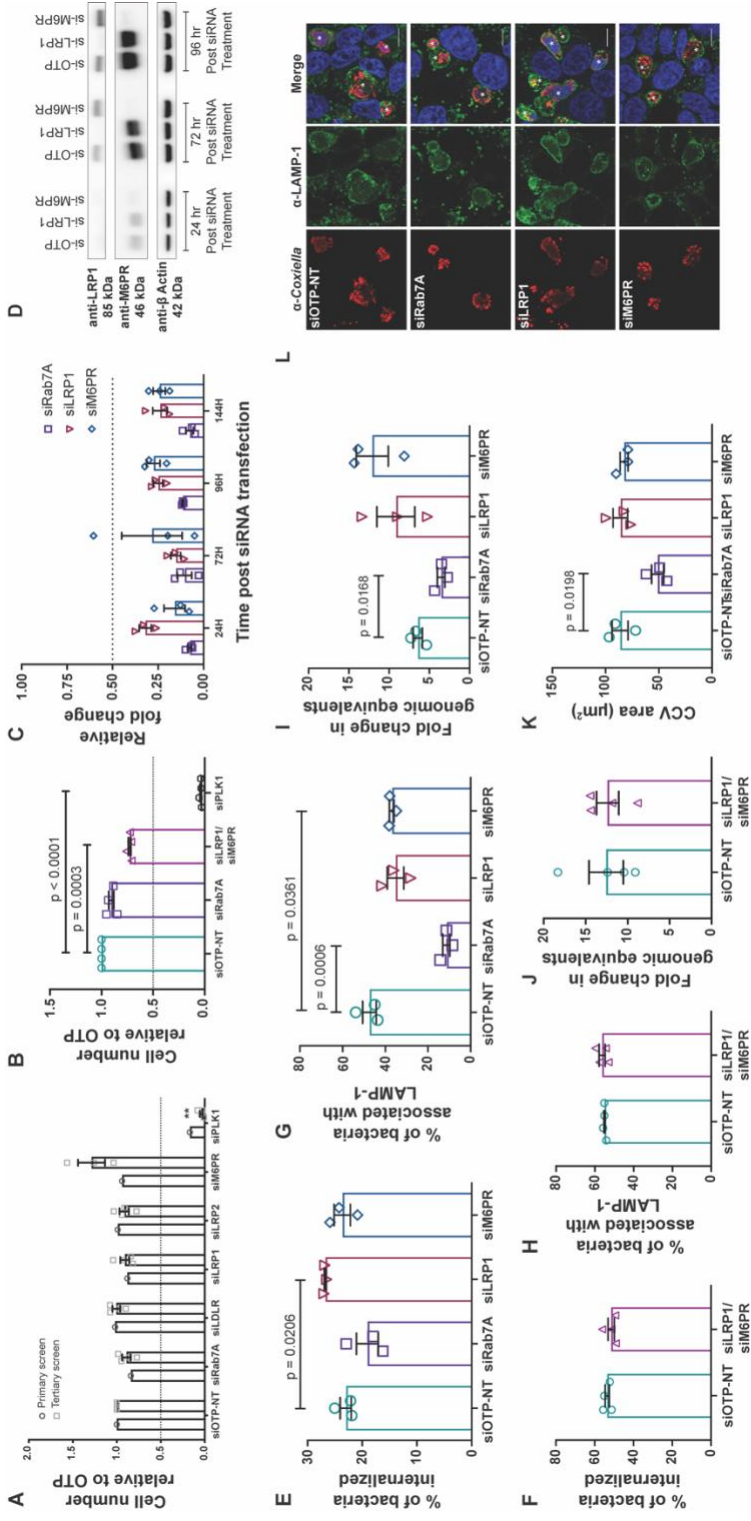

**Supplementary Figure 1. Using siRNA to investigate the role of specific lysosomal receptors during *C. burnetii* infection.** (A and B) HeLa cells used in the translocation assay (Figure 2A and 2B) were subsequently fixed and stained with DRAQ5™ to determine cell viability. Results are expressed relative to non-targeting control (siOTP-NT) with error bars indicating SEM from at least three independent experiments. Statistical difference between tested siRNA and siOTP-NT was determined using one-way ANOVA, followed by Dunnett's multiple comparison post-test on raw data. \*\*  $p < 0.01$ . The dotted line indicates a cell viability of 0.5 relative to siOTP-NT. The outcome from the primary screen (circles) are also shown for comparison in part A. (C) qRT-PCR measuring mRNA levels of Rab7A, LRP1 and M6PR in HeLa cells at the indicated times post siRNA transfection. Results are normalized to 18S rRNA and displayed as fold change relative to siOTP-NT-treated cells. A four-fold reduction in *LRP1* and *M6PR* mRNA compared to siOTP-NT treated HeLa cells over the total duration of experiments was observed. (D) The absence of protein expression was confirmed by immunoblot analysis of cell lysates from HeLa cells treated with siRNA SMARTpools collected at 24, 72 and 96 h post siRNA treatment using anti-LRP1 (top panel) and anti-M6PR (middle panel) antibodies. Anti- $\beta$  Actin was used as a loading control (bottom panel). (E-L) The impact of silencing *LRP1* or *M6PR* on *C. burnetii* infection was established either individually (E, G, I, K and L) or in combination (F, H and J) with *RAB7A* siRNA treatment used as a control. (E and F) Bacterial entry was ascertained in HeLa cells treated with siRNA SMARTpools for 72 h and infected with *C. burnetii* at a MOI of 100 for 4 h. Differential intracellular/extracellular staining was performed and at least 200 cell-associated bacteria were quantified per experiment.

Results are expressed as the mean percentage of internalized bacteria with no decrease in bacterial ingress observed compared to siOTP-NT treated cells. (G and H) Bacterial association with the lysosomal marker LAMP-1 was determined in HeLa cells treated with siRNA SMARTpools and infected with *C. burnetii* at a MOI of 100 for 6 h. Cells were fixed and stained with anti-LAMP-1 and anti-*Coxiella* antibodies. The localisation of LAMP-1 around at least 150 internalized bacteria was evaluated per experiment and results are expressed as the mean percentage of bacteria positively associated with LAMP-1. The slight reduction in *LRPI* (35%) and *M6PR* (37%) depleted cells was not as severe as observed in siRab7A treated cells in which progression to the lysosome is halted and only 11% of bacteria associated with LAMP-1. (I and J) Intracellular replication of *C. burnetii* in HeLa cells treated with siRNA SMARTpools and infected with *C. burnetii* at a MOI of 50 for 72 h. Results are presented as the fold-increase in genome equivalents three days post-infection relative to the inoculum as determined by *ompA*-specific qPCR. (K) The area of *C. burnetii* CCVs was determined in HeLa cells treated with siRNA SMARTpools and subsequently infected with *C. burnetii* at a MOI of 50 for 3 days. At least 50 CCV were measured per experiment and results are expressed as the average CCV area ( $\mu\text{m}^2$ ) from at least three experiments. Error bars represent SEM and statistical difference between siOTP-NT and tested siRNA was determined using an un-paired, two-tailed t-test on raw data. As expected, the decrease in LAMP-1 association correlated with a reduction in bacterial replication and vacuole size in *RAB7A* depleted HeLa cells infected with *C. burnetii* for 3 days with no reduction observed in other siRNA treatments. (L) Representative confocal micrograph images of siRNA treated HeLa cells infected for 3 days with *C. burnetii* used to quantify CCV area in part K. Cells

were stained with anti-*Coxiella* antibody (red), anti-LAMP-1 antibody (green) and DAPI (blue). Scale bars represent 10  $\mu\text{m}$ . Asterisk indicates CCV.

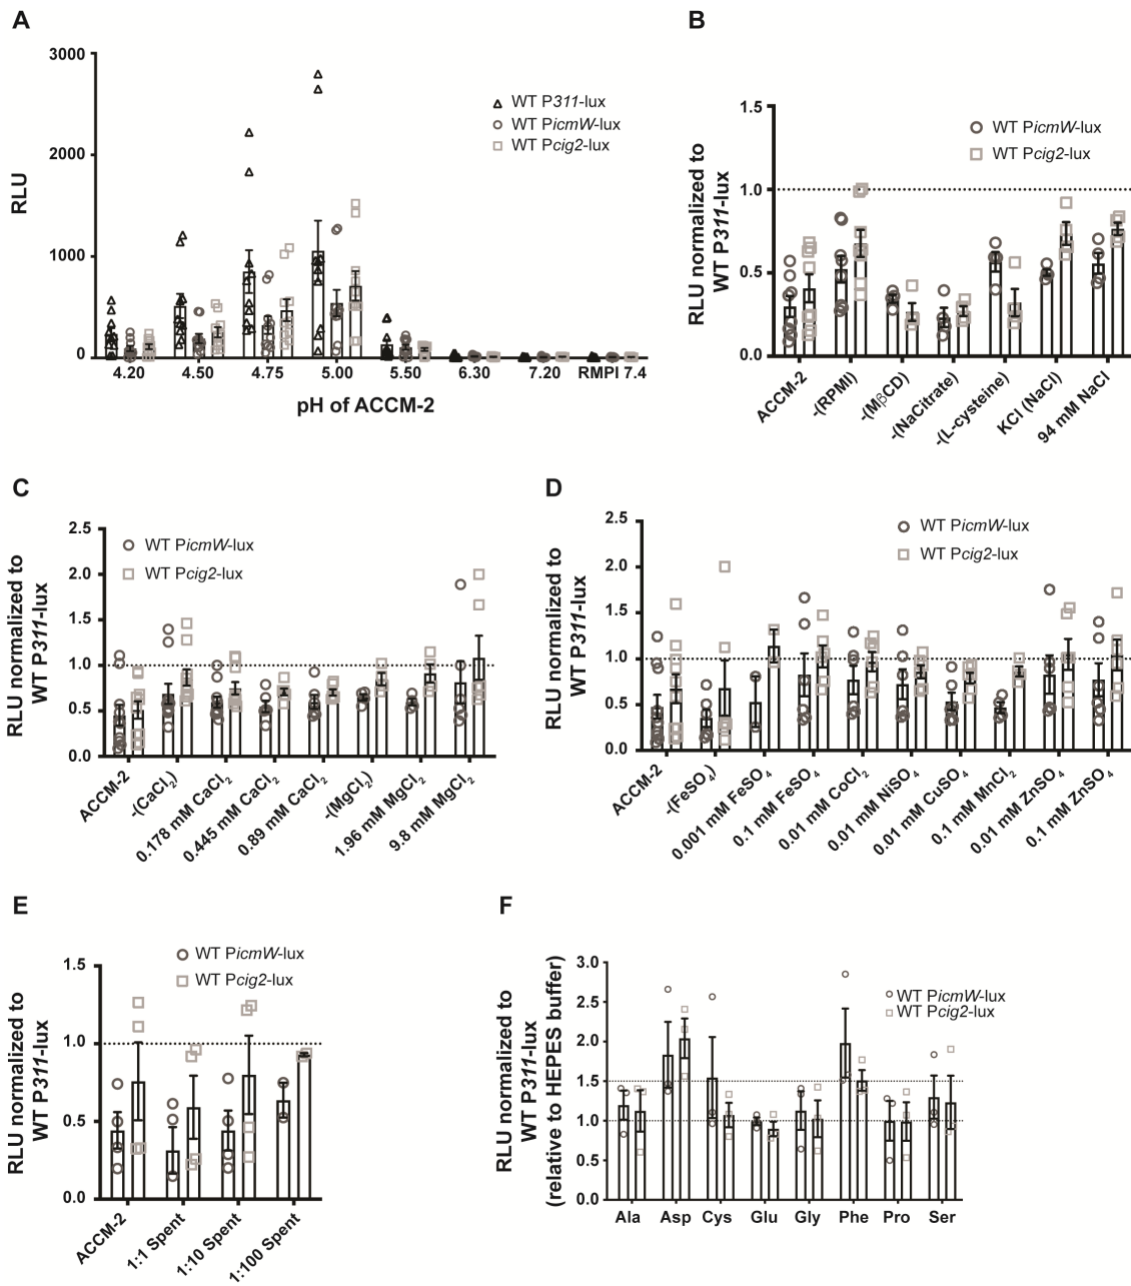

**Supplementary Figure 2. Altered pH and media composition does not specifically alter *PmrA* regulated gene transcription.** (A) Light production by  $1 \times 10^7$  GE of *C. burnetii* strains expressing bacterial luciferase activated by control (*P311*) or

PmrA-dependent (*PicmW* or *Pcig2*) promoters 48 h after inoculation into ACCM-2 or RPMI with pH adjusted as indicated. Data is presented as RLU (relative light units) with error bars representing SEM from five independent experiments. (B-E) Light production by PmrA-regulated *icmW* and *cig2* promoters 48 h after inoculation of  $5 \times 10^7$  GE into ACCM-2 with noted dropouts or substitutions (B, in parentheses) and modifications of  $\text{Ca}^{2+}/\text{Mg}^{2+}$  concentration (C), divalent cations (D) and spent media addition (E). Data is presented as RLU relative to the control (*P311-lux*) with error bars representing SEM from at least two independent experiments. Statistical difference between alterations and ACCM-2 for either *PicmW-lux* (circle) or *Pcig2-lux* (square) was determined using two-way ANOVA, followed by Dunnett's multiple comparison post-test on raw data following normalisation to *P311-lux*. (F) Axenic *C. burnetii* strains expressing bacterial luciferase reporters were grown for 72 h prior to the addition of 10 mM of different amino acids for 20 min. Data is presented as RLU relative to addition of HEPES buffer alone and normalized to *P311-lux* with error bars representing SEM from three independent experiments. Statistical difference between *P311-lux* and *PicmW-lux* (circle) or *Pcig2-lux* (square) was determined using two-way ANOVA, followed by Dunnett's multiple comparison post-test.

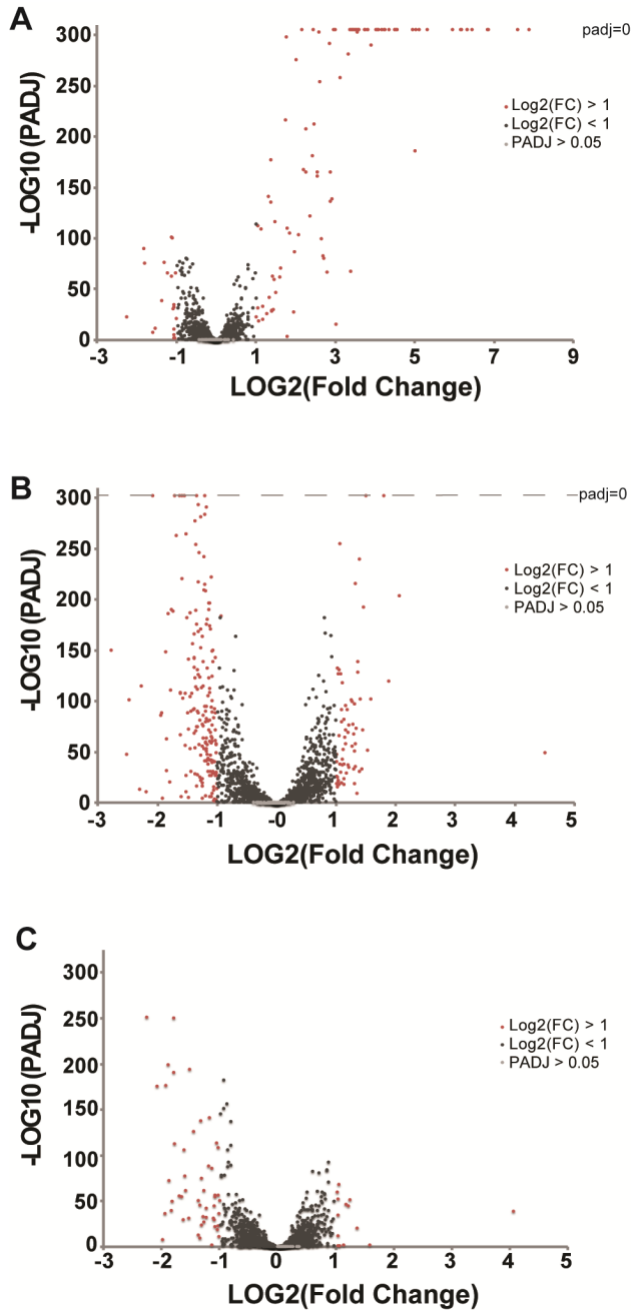

**Supplementary Figure 3. Global changes in *C. burnetii* gene expression, comparing WT and *pmrA*::Tn in the presence of water (H<sub>2</sub>O) or amino acids (AA). Volcano plots illustrate the distribution of change ( $\log_2(\text{fold change (FC)})$ ) detected against**

significance,  $p$ -value adjusted for multiple testing using Benjamini-Hochberg to estimate the false discovery rate (PADJ). (A) WT H<sub>2</sub>O versus *pmrA*::Tn H<sub>2</sub>O, (B) WT AA versus WT H<sub>2</sub>O, (C) *pmrA*::Tn AA versus *pmrA*::Tn H<sub>2</sub>O. Log<sub>2</sub>(FC) > 1 are shown in red, log<sub>2</sub>(FC) < 1 are black and comparisons with insignificant PADJ value (> 0.05) are shown in grey. Changes in expression that have PADJ values of zero are indicated by a dashed line.



**Table S1: Summary of statistically significant biological processes that were overrepresented in the 251 validated targets.** Includes both child and parent PANTHER GO-Slim Biological Process categories alongside p-values calculated using Fisher's exact test and the False Discovery Rate (FDR) calculated using the Benjamini-Hochberg procedure.

| PANTHER GO-SLIM Biological Process (parent categories) | Homo sapiens (REF) # | Validated targets # | Expected | Fold Enrichment | +/- | raw P value | FDR      |
|--------------------------------------------------------|----------------------|---------------------|----------|-----------------|-----|-------------|----------|
| <b>C-terminal protein amino acid modification</b>      | 3                    | 2                   | 0.03     | 67.95           | +   | 9.22E-04    | 2.81E-02 |
| ↳cellular process                                      | 6070                 | 83                  | 59.56    | 1.39            | +   | 4.96E-04    | 1.62E-02 |
| <b>intra-Golgi vesicle-mediated transport</b>          | 28                   | 9                   | 0.27     | 32.76           | +   | 6.37E-11    | 9.53E-09 |
| ↳Golgi vesicle transport                               | 124                  | 19                  | 1.22     | 15.62           | +   | 1.83E-16    | 5.48E-14 |
| ↳vesicle-mediated transport                            | 643                  | 38                  | 6.31     | 6.02            | +   | 1.76E-18    | 7.90E-16 |
| ↳transport                                             | 1255                 | 56                  | 12.31    | 4.55            | +   | 1.10E-21    | 6.58E-19 |
| ↳establishment of localization                         | 1255                 | 56                  | 12.31    | 4.55            | +   | 1.10E-21    | 9.87E-19 |
| ↳localization                                          | 2059                 | 76                  | 20.2     | 3.76            | +   | 4.39E-25    | 7.89E-22 |
| <b>activation of JUN kinase activity</b>               | 10                   | 3                   | 0.1      | 30.58           | +   | 2.41E-04    | 8.82E-03 |
| ↳regulation of macromolecule metabolic process         | 112                  | 6                   | 1.1      | 5.46            | +   | 1.05E-03    | 3.08E-02 |
| ↳positive regulation of protein kinase activity        | 60                   | 6                   | 0.59     | 10.19           | +   | 4.37E-05    | 2.31E-03 |
| ↳activation of protein kinase activity                 | 57                   | 6                   | 0.56     | 10.73           | +   | 3.35E-05    | 1.82E-03 |
| ↳JNK cascade                                           | 44                   | 4                   | 0.43     | 9.27            | +   | 1.21E-03    | 3.44E-02 |
| ↳stress-activated MAPK cascade                         | 45                   | 4                   | 0.44     | 9.06            | +   | 1.30E-03    | 3.60E-02 |
| ↳intracellular signal transduction                     | 777                  | 20                  | 7.62     | 2.62            | +   | 1.05E-04    | 4.49E-03 |
| ↳stress-activated protein kinase signaling cascade     | 43                   | 4                   | 0.42     | 9.48            | +   | 1.11E-03    | 3.23E-02 |
| <b>activation of MAPKK activity</b>                    | 20                   | 5                   | 0.2      | 25.48           | +   | 3.74E-06    | 2.92E-04 |
| <b>divalent metal ion transport</b>                    | 37                   | 7                   | 0.36     | 19.28           | +   | 2.09E-07    | 2.50E-05 |
| ↳metal ion transport                                   | 49                   | 7                   | 0.48     | 14.56           | +   | 1.14E-06    | 1.03E-04 |
| ↳cation transport                                      | 105                  | 8                   | 1.03     | 7.77            | +   | 1.48E-05    | 9.86E-04 |
| ↳ion transport                                         | 186                  | 8                   | 1.82     | 4.38            | +   | 6.38E-04    | 2.05E-02 |
| ↳divalent inorganic cation transport                   | 37                   | 7                   | 0.36     | 19.28           | +   | 2.09E-07    | 2.34E-05 |
| <b>cellular divalent inorganic cation homeostasis</b>  | 27                   | 5                   | 0.26     | 18.87           | +   | 1.34E-05    | 9.27E-04 |
| ↳regulation of biological quality                      | 643                  | 17                  | 6.31     | 2.69            | +   | 2.60E-04    | 9.33E-03 |
| <b>transition metal ion transport</b>                  | 41                   | 7                   | 0.4      | 17.4            | +   | 3.88E-07    | 4.10E-05 |
| <b>retrograde transport, endosome to Golgi</b>         | 33                   | 5                   | 0.32     | 15.44           | +   | 3.19E-05    | 1.91E-03 |
| ↳intracellular transport                               | 133                  | 7                   | 1.3      | 5.36            | +   | 4.46E-04    | 1.54E-02 |
| ↳cellular localization                                 | 934                  | 44                  | 9.16     | 4.8             | +   | 8.54E-18    | 3.07E-15 |
| ↳cytosolic transport                                   | 36                   | 5                   | 0.35     | 14.16           | +   | 4.65E-05    | 2.39E-03 |
| <b>transition metal ion homeostasis</b>                | 49                   | 7                   | 0.48     | 14.56           | +   | 1.14E-06    | 1.08E-04 |
| ↳metal ion homeostasis                                 | 69                   | 8                   | 0.68     | 11.82           | +   | 8.21E-07    | 8.19E-05 |
| <b>ER to Golgi vesicle-mediated transport</b>          | 84                   | 12                  | 0.82     | 14.56           | +   | 1.57E-10    | 2.17E-08 |
| <b>synaptic vesicle exocytosis</b>                     | 36                   | 5                   | 0.35     | 14.16           | +   | 4.65E-05    | 2.32E-03 |
| ↳synaptic signaling                                    | 331                  | 12                  | 3.25     | 3.7             | +   | 1.42E-04    | 5.41E-03 |
| ↳synaptic vesicle cycle                                | 26                   | 5                   | 0.26     | 19.6            | +   | 1.14E-05    | 8.20E-04 |
| ↳neurotransmitter secretion                            | 66                   | 5                   | 0.65     | 7.72            | +   | 6.38E-04    | 2.01E-02 |
| ↳chemical synaptic transmission                        | 330                  | 12                  | 3.24     | 3.71            | +   | 1.38E-04    | 5.62E-03 |
| ↳anterograde trans-synaptic signaling                  | 330                  | 12                  | 3.24     | 3.71            | +   | 1.38E-04    | 5.50E-03 |

|                                                     |       |    |        |       |   |          |          |
|-----------------------------------------------------|-------|----|--------|-------|---|----------|----------|
| ↳trans-synaptic signaling                           | 331   | 12 | 3.25   | 3.7   | + | 1.42E-04 | 5.53E-03 |
| ↳organelle localization                             | 77    | 8  | 0.76   | 10.59 | + | 1.76E-06 | 1.50E-04 |
| <b>organelle localization by membrane tethering</b> | 39    | 5  | 0.38   | 13.07 | + | 6.58E-05 | 3.11E-03 |
| <b>cellular metal ion homeostasis</b>               | 43    | 5  | 0.42   | 11.85 | + | 1.01E-04 | 4.41E-03 |
| <b>Ras protein signal transduction</b>              | 139   | 16 | 1.36   | 11.73 | + | 2.55E-12 | 4.17E-10 |
| ↳small GTPase mediated signal transduction          | 147   | 17 | 1.44   | 11.79 | + | 4.82E-13 | 8.66E-11 |
| <b>regulation of exocytosis</b>                     | 50    | 5  | 0.49   | 10.19 | + | 1.93E-04 | 7.24E-03 |
| ↳regulation of vesicle-mediated transport           | 62    | 5  | 0.61   | 8.22  | + | 4.89E-04 | 1.63E-02 |
| <b>lipid transport</b>                              | 83    | 8  | 0.81   | 9.82  | + | 2.95E-06 | 2.41E-04 |
| ↳lipid localization                                 | 92    | 8  | 0.9    | 8.86  | + | 6.00E-06 | 4.49E-04 |
| ↳macromolecule localization                         | 172   | 9  | 1.69   | 5.33  | + | 7.21E-05 | 3.32E-03 |
| <b>synaptic transmission, glutamatergic</b>         | 44    | 4  | 0.43   | 9.27  | + | 1.21E-03 | 3.38E-02 |
| <b>response to metal ion</b>                        | 47    | 4  | 0.46   | 8.67  | + | 1.51E-03 | 4.12E-02 |
| <b>inorganic cation transmembrane transport</b>     | 84    | 7  | 0.82   | 8.49  | + | 3.00E-05 | 1.86E-03 |
| ↳ion transmembrane transport                        | 85    | 7  | 0.83   | 8.39  | + | 3.22E-05 | 1.86E-03 |
| ↳inorganic ion transmembrane transport              | 85    | 7  | 0.83   | 8.39  | + | 3.22E-05 | 1.81E-03 |
| <b>regulation of gene expresssion</b>               | 72    | 5  | 0.71   | 7.08  | + | 9.24E-04 | 2.77E-02 |
| <b>vesicle fusion to plasma membrane</b>            | 116   | 8  | 1.14   | 7.03  | + | 2.91E-05 | 1.87E-03 |
| ↳vesicle fusion                                     | 22    | 4  | 0.22   | 18.53 | + | 1.09E-04 | 4.57E-03 |
| ↳membrane fusion                                    | 138   | 8  | 1.35   | 5.91  | + | 9.29E-05 | 4.17E-03 |
| ↳membrane organization                              | 378   | 12 | 3.71   | 3.24  | + | 4.56E-04 | 1.54E-02 |
| ↳plasma membrane fusion                             | 125   | 8  | 1.23   | 6.52  | + | 4.81E-05 | 2.33E-03 |
| <b>protein targeting</b>                            | 84    | 5  | 0.82   | 6.07  | + | 1.77E-03 | 4.74E-02 |
| ↳intracellular protein transport                    | 714   | 37 | 7.01   | 5.28  | + | 2.94E-16 | 7.55E-14 |
| ↳cellular protein localization                      | 853   | 40 | 8.37   | 4.78  | + | 3.94E-16 | 8.84E-14 |
| ↳cellular macromolecule localization                | 857   | 40 | 8.41   | 4.76  | + | 4.58E-16 | 9.14E-14 |
| <b>receptor-mediated endocytosis</b>                | 103   | 6  | 1.01   | 5.94  | + | 6.90E-04 | 2.14E-02 |
| ↳endocytosis                                        | 314   | 11 | 3.08   | 3.57  | + | 3.55E-04 | 1.25E-02 |
| Unclassified                                        | 10588 | 64 | 103.88 | 0.62  | - | 3.26E-08 | 4.18E-06 |

**Table S2: Targets that have been experimentally verified as either exclusive or partial lysosomal localisation (12).** Targets are ranked according to the translocation ratio outcome from the primary screen. Targets selected for the validation screen are noted alongside the outcome from the validation screen. **Green fill indicates normalised ratio  $\leq 0.8$ .**

| Entrez gene name | Description                                             | Genbank Accession number | Average cell count normalised to OTP | Average ratio normalised to OTP | Validation screen | Level of confidence       |
|------------------|---------------------------------------------------------|--------------------------|--------------------------------------|---------------------------------|-------------------|---------------------------|
| ATP6V0C          | ATPase, H+ transporting, lysosomal 16kDa, V0 subunit c  | NM_001694                | 0.85                                 | 0.26                            | Yes               | Moderate-confidence (2/4) |
| ATP6V1E1         | ATPase, H+ transporting, lysosomal 31kDa, V1 subunit E1 | NM_001039367             | 0.99                                 | 0.3                             | Yes               | High-confidence (4/4)     |
| FLJ10815         | solute carrier family 38, member 7                      | NM_018231                | 0.78                                 | 0.36                            | Yes               | Did not validate          |
| KIAA1001         | arylsulfatase G                                         | NM_014960                | 1.01                                 | 0.44                            |                   |                           |
| CLN2             | tripeptidyl peptidase I                                 | NM_000391                | 1.03                                 | 0.46                            |                   |                           |
| PTTG1IP          | pituitary tumor-transforming 1 interacting protein      | NM_004339                | 1.01                                 | 0.48                            |                   |                           |
| SPPL2A           | signal peptide peptidase-like 2A                        | NM_032802                | 1.09                                 | 0.48                            |                   |                           |
| ATP6V0A1         | ATPase, H+ transporting, lysosomal V0 subunit a1        | NM_005177                | 1.05                                 | 0.49                            |                   |                           |
| ATP6A            | ATPase, H+                                              | NM_0011                  | 0.9                                  | 0.5                             |                   |                           |

|          |                                                         |              |      |      |     |                           |
|----------|---------------------------------------------------------|--------------|------|------|-----|---------------------------|
| P1       | transporting, lysosomal accessory protein 1             | 83           |      |      |     |                           |
| HEXA     | hexosaminidase A (alpha polypeptide)                    | NM_000520    | 0.97 | 0.5  |     |                           |
| FLJ20014 | chromosome 17 open reading frame 59                     | NM_017622    | 0.65 | 0.52 |     |                           |
| PPGB     | cathepsin A                                             | NM_000308    | 1.12 | 0.52 | Yes | Did not validate          |
| ATP6V1A  | ATPase, H+ transporting, lysosomal 70kDa, V1 subunit A  | NM_001690    | 0.93 | 0.53 |     |                           |
| ATP6V1C1 | ATPase, H+ transporting, lysosomal 42kDa, V1 subunit C1 | NM_001695    | 0.98 | 0.53 |     |                           |
| HPSE     | heparanase                                              | NM_001098540 | 0.99 | 0.53 |     |                           |
| PSAP     | prosaposin                                              | NM_002778    | 0.98 | 0.53 |     |                           |
| CD63     | CD63 molecule                                           | NM_001040034 | 1    | 0.54 |     |                           |
| CTSF     | cathepsin F                                             | NM_003793    | 0.96 | 0.54 | Yes | Did not validate          |
| FLJ20507 | transmembrane protein 127                               | NM_017849    | 0.94 | 0.54 | Yes | Moderate confidence (2/4) |
| GNS      | glucosamine (N-acetyl)-6-sulfatase                      | NM_002076    | 1.08 | 0.55 |     |                           |
| GALNS    | galactosamine (N-acetyl)-6-sulfatase                    | NM_000512    | 0.93 | 0.56 |     |                           |
| RRAG     | Ras-related                                             | NM_0065      | 1.12 | 0.57 | Yes | Did not                   |

|          |                                                           |              |      |      |     |                           |
|----------|-----------------------------------------------------------|--------------|------|------|-----|---------------------------|
| A        | GTP binding A                                             | 70           |      |      |     | validate                  |
| TPCN2    | two pore segment channel 2                                | NM_139075    | 0.84 | 0.57 |     |                           |
| CTSO     | cathepsin O                                               | NM_001334    | 1.04 | 0.58 | Yes | Did not validate          |
| MANBA    | mannosidase, beta A, lysosomal                            | NM_005908    | 1    | 0.58 | Yes | High-confidence (4/4)     |
| FLJ30668 | transmembrane protein 74                                  | NM_153015    | 0.9  | 0.58 | Yes | Moderate-confidence (2/4) |
| CTSC     | cathepsin C                                               | NM_001814    | 1.14 | 0.59 | Yes | High-confidence (3/4)     |
| ARL10B   | ADP-ribosylation factor-like 8A                           | NM_138795    | 0.92 | 0.6  |     |                           |
| LAPTM4B  | lysosomal protein transmembrane 4 beta                    | NM_018407    | 0.92 | 0.6  | Yes | Did not validate          |
| LAPTM5   | lysosomal protein transmembrane 5                         | NM_006762    | 0.88 | 0.61 | Yes | Did not validate          |
| ATP6V0E  | ATPase, H+ transporting, lysosomal 9kDa, V0 subunit e1    | NM_003945    | 0.87 | 0.62 |     |                           |
| ATP6V1H  | ATPase, H+ transporting, lysosomal 50/57kDa, V1 subunit H | NM_213620    | 0.5  | 0.62 |     |                           |
| SCARB2   | scavenger receptor class B, member 2                      | NM_005506    | 0.96 | 0.62 |     |                           |
| SIDT2    | SID1 transmembrane family,                                | NM_001040455 | 0.99 | 0.62 |     |                           |

|               |                                                               |                  |      |             |     |                              |
|---------------|---------------------------------------------------------------|------------------|------|-------------|-----|------------------------------|
|               | member 2                                                      |                  |      |             |     |                              |
| NEU1          | sialidase 1<br>(lysosomal<br>sialidase)                       | NM_0004<br>34    | 0.93 | <b>0.63</b> | Yes | Moderate<br>confidence (2/4) |
| FUCA1         | fucosidase,<br>alpha-L- 1,<br>tissue                          | NM_0001<br>47    | 0.94 | <b>0.64</b> |     |                              |
| CLCN7         | chloride<br>channel 7                                         | NM_0012<br>87    | 0.92 | <b>0.65</b> |     |                              |
| ARL10<br>C    | ADP-<br>ribosylation<br>factor-like 8B                        | NM_0181<br>84    | 1.12 | <b>0.66</b> |     |                              |
| CTSS          | cathepsin S                                                   | NM_0040<br>79    | 1.02 | <b>0.66</b> | Yes | Did not<br>validate          |
| NPC2          | Niemann-Pick<br>disease, type<br>C2                           | NM_0064<br>32    | 1.19 | <b>0.66</b> | Yes | High-<br>confidence (3/4)    |
| HYAL2         | hyaluronogluc<br>osaminidase 2                                | NM_0037<br>73    | 0.84 | <b>0.67</b> |     |                              |
| C20OR<br>F103 | chromosome<br>20 open<br>reading frame<br>103                 | NM_0122<br>61    | 1.23 | <b>0.68</b> |     |                              |
| LIPA          | lipase A,<br>lysosomal acid,<br>cholesterol<br>esterase       | NM_0002<br>35    | 1.1  | <b>0.68</b> | Yes | Did not<br>validate          |
| ASAHL         | N-<br>acylethanolam<br>ine acid<br>amidase                    | NM_0010<br>42402 | 1.07 | <b>0.68</b> |     |                              |
| MGC3<br>3302  | major<br>facilitator<br>superfamily<br>domain<br>containing 8 | NM_1527<br>78    | 0.97 | <b>0.69</b> |     |                              |
| NEU4          | sialidase 4                                                   | NM_0807<br>41    | 0.97 | <b>0.69</b> |     |                              |
| CTSB          | cathepsin B                                                   | NM_0019<br>08    | 1.14 | <b>0.7</b>  | Yes | Moderate<br>confidence (2/4) |

|              |                                                                                                       |                  |      |      |     |                                       |
|--------------|-------------------------------------------------------------------------------------------------------|------------------|------|------|-----|---------------------------------------|
| DEPD<br>C6   | DEP domain<br>containing<br>MTOR-<br>interacting<br>protein                                           | NM_0227<br>83    | 0.9  | 0.7  |     |                                       |
| C7ORF<br>28A | CCZ1 vacuolar<br>protein<br>trafficking and<br>biogenesis<br>associated<br>homolog (S.<br>cerevisiae) | NM_0156<br>22    | 1.01 | 0.71 |     |                                       |
| CTNS         | cystinosis,<br>lysosomal<br>cystine<br>transporter                                                    | NM_0010<br>31681 | 0.9  | 0.71 | Yes | Moderat<br>e-<br>confiden<br>ce (2/4) |
| EPDR1        | ependymin<br>related protein<br>1 (zebrafish)                                                         | NM_0175<br>49    | 0.9  | 0.71 |     |                                       |
| LGMN         | legumain                                                                                              | NM_0056<br>06    | 1.13 | 0.72 | Yes | Did not<br>validate                   |
| AGA          | aspartylglucos<br>aminidase                                                                           | NM_0000<br>27    | 0.87 | 0.73 |     |                                       |
| C2ORF<br>28  | chromosome 2<br>open reading<br>frame 28                                                              | NM_0160<br>85    | 1.12 | 0.73 |     |                                       |
| NAGL<br>U    | N-<br>acetylglucosa<br>minidase,<br>alpha                                                             | NM_0002<br>63    | 0.93 | 0.73 |     |                                       |
| MPO          | myeloperoxida<br>se                                                                                   | NM_0002<br>50    | 0.98 | 0.74 |     |                                       |
| NPC1         | Niemann-Pick<br>disease, type<br>C1                                                                   | NM_0002<br>71    | 0.92 | 0.74 | Yes | High-<br>confiden<br>ce (4/4)         |
| SLC26<br>A11 | solute carrier<br>family 26,<br>member 11                                                             | NM_1736<br>26    | 0.96 | 0.74 | Yes | Moderat<br>e-<br>confiden<br>ce (2/4) |
| SLC37<br>A3  | solute carrier<br>family 37<br>(glycerol-3-<br>phosphate                                              | NM_0322<br>95    | 1    | 0.74 |     |                                       |

|           |                                                                    |              |      |             |     |                           |
|-----------|--------------------------------------------------------------------|--------------|------|-------------|-----|---------------------------|
|           | transporter), member 3                                             |              |      |             |     |                           |
| MGC4618   | transmembrane protein 175                                          | NM_032326    | 1.09 | <b>0.74</b> | Yes | Moderate confidence (2/4) |
| ATP6V1F   | ATPase, H <sup>+</sup> transporting, lysosomal 14kDa, V1 subunit F | NM_004231    | 0.96 | <b>0.76</b> |     |                           |
| PRCP      | prolylcarboxypeptidase (angiotensinase C)                          | NM_005040    | 1.05 | <b>0.76</b> |     |                           |
| FLJ90709  | solute carrier family 38, member 9                                 | NM_173514    | 1.06 | <b>0.76</b> |     |                           |
| CTBS      | chitinase, di-N-acetyl-                                            | NM_004388    | 1.01 | <b>0.77</b> |     |                           |
| PQLC2     | PQ loop repeat containing 2                                        | NM_001040126 | 1.09 | <b>0.77</b> |     |                           |
| TDE2L     | serine incorporator 2                                              | NM_178865    | 1.02 | <b>0.77</b> |     |                           |
| HEXB      | hexosaminidase B (beta polypeptide)                                | NM_000521    | 0.96 | <b>0.78</b> |     |                           |
| GM2A      | GM2 ganglioside activator                                          | NM_000405    | 1.08 | <b>0.8</b>  |     |                           |
| RHEB      | Ras homolog enriched in brain                                      | NM_005614    | 1    | <b>0.8</b>  |     |                           |
| C2ORF18   | chromosome 2 open reading frame 18                                 | NM_017877    | 1.06 | <b>0.8</b>  |     |                           |
| LOC283537 | solute carrier family 46, member 3                                 | NM_181785    | 0.92 | <b>0.8</b>  |     |                           |
| TSC2      | tuberous sclerosis 2                                               | NM_001077183 | 1.21 | <b>0.8</b>  |     |                           |
| FRAP1     | mechanistic target of                                              | NM_004958    | 0.94 | <b>0.81</b> |     |                           |



|          |                                                         |              |      |             |     |                  |
|----------|---------------------------------------------------------|--------------|------|-------------|-----|------------------|
|          | rapamycin<br>(serine/threonine kinase)                  |              |      |             |     |                  |
| ABCD4    | ATP-binding cassette, sub-family D (ALD), member 4      | NM_005050    | 0.97 | <b>0.82</b> |     |                  |
| ATP6V0D1 | ATPase, H+ transporting, lysosomal 38kDa, V0 subunit d1 | NM_004691    | 0.94 | <b>0.82</b> |     |                  |
| CTSD     | cathepsin D                                             | NM_001909    | 1.1  | <b>0.82</b> | Yes | Did not validate |
| GBA      | glucosidase, beta, acid                                 | NM_000157    | 0.94 | <b>0.82</b> |     |                  |
| IFI30    | interferon, gamma-inducible protein 30                  | NM_006332    | 0.88 | <b>0.82</b> |     |                  |
| FLJ38482 | transmembrane protein 192                               | NM_001100389 | 1.13 | <b>0.82</b> |     |                  |
| ATP6V1G1 | ATPase, H+ transporting, lysosomal 13kDa, V1 subunit G1 | NM_004888    | 1.1  | <b>0.83</b> |     |                  |
| ARSA     | arylsulfatase A                                         | NM_001085428 | 0.96 | <b>0.84</b> |     |                  |
| MGC31963 | chromosome 1 open reading frame 85                      | NM_144580    | 0.88 | <b>0.84</b> |     |                  |
| PGCP     | plasma glutamate carboxypeptidase                       | NM_016134    | 1.18 | <b>0.84</b> |     |                  |
| LOH12CR1 | loss of heterozygosity, 12, chromosomal region 1        | NM_058169    | 1.01 | <b>0.86</b> |     |                  |
| NCSTN    | nicastrin                                               | NM_015331    | 0.98 | <b>0.86</b> |     |                  |

|              |                                                                             |               |      |             |     |                     |
|--------------|-----------------------------------------------------------------------------|---------------|------|-------------|-----|---------------------|
| MGC3<br>265  | prenylcysteine<br>oxidase 1 like                                            | NM_0240<br>28 | 0.9  | <b>0.86</b> |     |                     |
| ACP2         | acid<br>phosphatase 2,<br>lysosomal                                         | NM_0016<br>10 | 0.98 | <b>0.87</b> |     |                     |
| BCL2L<br>11  | BCL2-like 11<br>(apoptosis<br>facilitator)                                  | NM_2070<br>02 | 1.04 | <b>0.87</b> |     |                     |
| PPT2         | palmitoyl-<br>protein<br>thioesterase 2                                     | NM_0051<br>55 | 0.9  | <b>0.87</b> |     |                     |
| MAPB<br>PIP  | late<br>endosomal/lys<br>osomal<br>adaptor, MAPK<br>and MTOR<br>activator 2 | NM_0140<br>17 | 0.26 | <b>0.88</b> |     |                     |
| MCRS<br>1    | microspherule<br>protein 1                                                  | NM_0063<br>37 | 0.9  | <b>0.88</b> |     |                     |
| KIAA0<br>602 | phosphofurin<br>acidic cluster<br>sorting protein<br>2                      | NM_0151<br>97 | 1.05 | <b>0.88</b> |     |                     |
| TPCN1        | two pore<br>segment<br>channel 1                                            | NM_0179<br>01 | 0.98 | <b>0.88</b> |     |                     |
| ATP6V<br>1D  | ATPase, H+<br>transporting,<br>lysosomal<br>34kDa, V1<br>subunit D          | NM_0159<br>94 | 1.04 | <b>0.89</b> |     |                     |
| C10OR<br>F32 | chromosome<br>10 open<br>reading frame<br>32                                | NM_1445<br>91 | 0.84 | <b>0.89</b> |     |                     |
| FYCO1        | FYVE and<br>coiled-coil<br>domain<br>containing 1                           | NM_0245<br>13 | 1.14 | <b>0.89</b> |     |                     |
| GUSB         | glucuronidase,<br>beta                                                      | NM_0001<br>81 | 1.04 | <b>0.89</b> |     |                     |
| MCOL<br>N1   | mucolipin 1                                                                 | NM_0205<br>33 | 0.98 | <b>0.89</b> | Yes | Did not<br>validate |

|               |                                                                              |              |      |             |  |  |
|---------------|------------------------------------------------------------------------------|--------------|------|-------------|--|--|
| SLC17A5       | solute carrier family 17 (anion/sugar transporter), member 5                 | NM_012434    | 0.99 | <b>0.89</b> |  |  |
| CD68          | CD68 molecule                                                                | NM_001040059 | 1.04 | <b>0.9</b>  |  |  |
| GAA           | glucosidase, alpha; acid                                                     | NM_001079804 | 0.92 | <b>0.9</b>  |  |  |
| GZMA          | granzyme A (granzyme 1, cytotoxic T-lymphocyte-associated serine esterase 3) | NM_006144    | 0.48 | <b>0.9</b>  |  |  |
| PPT1          | palmitoyl-protein thioesterase 1                                             | NM_000310    | 1.09 | <b>0.9</b>  |  |  |
| SMPD1         | sphingomyelin phosphodiesterase 1, acid lysosomal                            | NM_001007593 | 0.98 | <b>0.9</b>  |  |  |
| TTYH3         | tweety homolog 3 (Drosophila)                                                | NM_025250    | 0.93 | <b>0.9</b>  |  |  |
| ABCA2         | ATP-binding cassette, sub-family A (ABC1), member 2                          | NM_001606    | 1.04 | <b>0.91</b> |  |  |
| CPVL          | carboxypeptidase, vitellogenic-like                                          | NM_031311    | 1.04 | <b>0.91</b> |  |  |
| C6ORF209      | LMBR1 domain containing 1                                                    | NM_018368    | 0.98 | <b>0.91</b> |  |  |
| DKFZP313G1735 | arylsulfatase family, member K                                               | NM_198150    | 1.01 | <b>0.92</b> |  |  |
| CTSL          | cathepsin L1                                                                 | NM_145918    | 1.09 | <b>0.92</b> |  |  |
| GGH           | gamma-                                                                       | NM_0038      | 1.06 | <b>0.92</b> |  |  |

|               |                                                                                                  |                  |      |             |  |  |
|---------------|--------------------------------------------------------------------------------------------------|------------------|------|-------------|--|--|
|               | glutamyl<br>hydrolase<br>(conjugase,<br>folylpolygamm<br>aglutamyl<br>hydrolase)                 | 78               |      |             |  |  |
| LAMP<br>3     | lysosomal-<br>associated<br>membrane<br>protein 3                                                | NM_0143<br>98    | 1.14 | <b>0.92</b> |  |  |
| LYPLA<br>3    | phospholipase<br>A2, group XV                                                                    | NM_0123<br>20    | 0.99 | <b>0.92</b> |  |  |
| REN           | renin                                                                                            | NM_0005<br>37    | 0.8  | <b>0.92</b> |  |  |
| TSPAN<br>-1   | tetraspanin 1                                                                                    | NM_0057<br>27    | 0.96 | <b>0.92</b> |  |  |
| BAX           | BCL2-<br>associated X<br>protein                                                                 | NM_1387<br>63    | 0.91 | <b>0.93</b> |  |  |
| GZMB          | granzyme B<br>(granzyme 2,<br>cytotoxic T-<br>lymphocyte-<br>associated<br>serine esterase<br>1) | NM_0041<br>31    | 0.98 | <b>0.93</b> |  |  |
| CTSZ          | cathepsin Z                                                                                      | NM_0013<br>36    | 0.9  | <b>0.94</b> |  |  |
| CSE-C         | sialic acid<br>acetyl esterase                                                                   | NM_1706<br>01    | 1    | <b>0.94</b> |  |  |
| LOC38<br>9541 | chromosome 7<br>open reading<br>frame 59                                                         | NM_0010<br>08395 | 0.87 | <b>0.96</b> |  |  |
| OSTM<br>1     | osteopetrosis<br>associated<br>transmembran<br>e protein 1                                       | NM_0140<br>28    | 1.08 | <b>0.96</b> |  |  |
| RRAG<br>B     | Ras-related<br>GTP binding B                                                                     | NM_0060<br>64    | 0.97 | <b>0.96</b> |  |  |
| TMEM<br>8     | transmembran<br>e protein 8A                                                                     | NM_0212<br>59    | 1.02 | <b>0.96</b> |  |  |
| ATP6V<br>1B2  | ATPase, H+<br>transporting,                                                                      | NM_0016<br>93    | 0.92 | <b>0.98</b> |  |  |

|            |                                                                     |                  |      |             |  |  |
|------------|---------------------------------------------------------------------|------------------|------|-------------|--|--|
|            | lysosomal<br>56/58kDa, V1<br>subunit B2                             |                  |      |             |  |  |
| MFSD<br>1  | major<br>facilitator<br>superfamily<br>domain<br>containing 1       | NM_0227<br>36    | 1.05 | <b>0.98</b> |  |  |
| SNAP<br>AP | SNAP-<br>associated<br>protein                                      | NM_0124<br>37    | 1.17 | <b>0.98</b> |  |  |
| TM6S<br>F1 | transmembran<br>e 6<br>superfamily<br>member 1                      | NM_0230<br>03    | 1.06 | <b>0.98</b> |  |  |
| ABCB6      | ATP-binding<br>cassette, sub-<br>family B<br>(MDR/TAP),<br>member 6 | NM_0056<br>89    | 0.96 | <b>0.99</b> |  |  |
| LGALS<br>3 | lectin,<br>galactoside-<br>binding,<br>soluble, 3                   | NM_0023<br>06    | 0.7  | <b>0.99</b> |  |  |
| LAMP<br>2  | lysosomal-<br>associated<br>membrane<br>protein 2                   | NM_0022<br>94    | 1.13 | <b>1</b>    |  |  |
| ABCB9      | ATP-binding<br>cassette, sub-<br>family B<br>(MDR/TAP),<br>member 9 | NM_0196<br>24    | 0.61 | <b>1.01</b> |  |  |
| CTSH       | cathepsin H                                                         | NM_1489<br>79    | 0.98 | <b>1.02</b> |  |  |
| HYAL1      | hyaluronogluc<br>osaminidase 1                                      | NM_0073<br>12    | 1.12 | <b>1.02</b> |  |  |
| MARC<br>H8 | membrane-<br>associated ring<br>finger (C3HC4)<br>8                 | NM_0010<br>02266 | 1.02 | <b>1.02</b> |  |  |
| GBL        | MTOR<br>associated                                                  | NM_0223<br>72    | 0.97 | <b>1.02</b> |  |  |

|            |                                                                  |           |      |             |  |  |
|------------|------------------------------------------------------------------|-----------|------|-------------|--|--|
|            | protein, LST8 homolog ( <i>S. cerevisiae</i> )                   |           |      |             |  |  |
| RRAG D     | Ras-related GTP binding D                                        | NM_021244 | 0.62 | <b>1.02</b> |  |  |
| SGSH       | N-sulfoglucosamine sulfohydrolase                                | NM_000199 | 1.1  | <b>1.02</b> |  |  |
| MAP2 K1IP1 | late endosomal/lysosomal adaptor, MAPK and MTOR activator 3      | NM_021970 | 1.09 | <b>1.03</b> |  |  |
| SLC36 A1   | solute carrier family 36 (proton/amino acid symporter), member 1 | NM_078483 | 1.1  | <b>1.04</b> |  |  |
| MEF2 B     | MEF2BNB-MEF2B readthrough                                        | NM_005919 | 0.93 | <b>1.05</b> |  |  |
| APCS       | amyloid P component, serum                                       | NM_001639 | 1.01 | <b>1.06</b> |  |  |
| NAGA       | N-acetylgalactosaminidase, alpha-                                | NM_000262 | 1    | <b>1.06</b> |  |  |
| CREG       | cellular repressor of E1A-stimulated genes 1                     | NM_003851 | 1.06 | <b>1.07</b> |  |  |
| DNASE2     | deoxyribonuclease II, lysosomal                                  | NM_001375 | 1.05 | <b>1.07</b> |  |  |
| MAN2 B2    | mannosidase, alpha, class 2B, member 2                           | NM_015274 | 0.98 | <b>1.07</b> |  |  |
| AKT1S      | AKT1 substrate                                                   | NM_0010   | 1.04 | <b>1.08</b> |  |  |

|         |                                                                       |              |      |             |  |  |
|---------|-----------------------------------------------------------------------|--------------|------|-------------|--|--|
| 1       | 1 (proline-rich)                                                      | 98633        |      |             |  |  |
| IDUA    | iduronidase, alpha-L-                                                 | NM_000203    | 0.98 | <b>1.08</b> |  |  |
| GLB1    | galactosidase, beta 1                                                 | NM_001079811 | 0.96 | <b>1.1</b>  |  |  |
| MAN2B1  | mannosidase, alpha, class 2B, member 1                                | NM_000528    | 1.12 | <b>1.1</b>  |  |  |
| SLC37A2 | solute carrier family 37 (glycerol-3-phosphate transporter), member 2 | NM_198277    | 1.12 | <b>1.1</b>  |  |  |
| SCPEP1  | serine carboxypeptidase 1                                             | NM_021626    | 1    | <b>1.11</b> |  |  |
| ACP5    | acid phosphatase 5, tartrate resistant                                | NM_001611    | 0.98 | <b>1.12</b> |  |  |
| RNASET2 | ribonuclease T2                                                       | NM_003730    | 1.02 | <b>1.12</b> |  |  |
| TTYH2   | tweety homolog 2 (Drosophila)                                         | NM_052869    | 1.1  | <b>1.12</b> |  |  |
| DIRC2   | disrupted in renal carcinoma 2                                        | NM_032839    | 0.96 | <b>1.14</b> |  |  |
| PLD3    | phospholipase D family, member 3                                      | NM_012268    | 1.07 | <b>1.14</b> |  |  |
| DPP7    | dipeptidyl-peptidase 7                                                | NM_013379    | 1.02 | <b>1.15</b> |  |  |
| CTSK    | cathepsin K                                                           | NM_000396    | 1.07 | <b>1.16</b> |  |  |
| C14ORF9 | transmembrane protein 55B                                             | NM_144568    | 1.02 | <b>1.16</b> |  |  |
| TM7SF1  | G protein-coupled receptor 137B                                       | NM_003272    | 1.04 | <b>1.19</b> |  |  |
| BLOC1S1 | biogenesis of lysosomal                                               | NM_001487    | 0.98 | <b>1.2</b>  |  |  |

|         |                                                         |              |      |             |  |  |
|---------|---------------------------------------------------------|--------------|------|-------------|--|--|
|         | organelles complex-1, subunit 1                         |              |      |             |  |  |
| ASAH1   | N-acylsphingosine amidohydrolase (acid ceramidase) 1    | NM_004315    | 0.86 | <b>1.21</b> |  |  |
| BLOC1S2 | biogenesis of lysosomal organelles complex-1, subunit 2 | NM_001001342 | 1.06 | <b>1.21</b> |  |  |
| GALC    | galactosylceramidase                                    | NM_001037525 | 1.06 | <b>1.21</b> |  |  |
| IDS     | iduronate 2-sulfatase                                   | NM_006123    | 1    | <b>1.21</b> |  |  |
| ARSB    | arylsulfatase B                                         | NM_198709    | 1.06 | <b>1.23</b> |  |  |
| LYSAL1  | ectonucleoside triphosphate diphosphohydrolase 4        | NM_004901    | 1.03 | <b>1.23</b> |  |  |
| GLA     | galactosidase, alpha                                    | NM_000169    | 0.84 | <b>1.23</b> |  |  |
| IL4I1   | interleukin 4 induced 1                                 | NM_152899    | 1.06 | <b>1.23</b> |  |  |
| LITAF   | lipopolysaccharide-induced TNF factor                   | NM_004862    | 0.83 | <b>1.27</b> |  |  |
| HBXIP   | hepatitis B virus x interacting protein                 | NM_006402    | 1.1  | <b>1.31</b> |  |  |
| MGC2749 | chromosome 19 open reading frame 50                     | NM_024069    | 1.19 | <b>1.36</b> |  |  |
| RRAGC   | Ras-related GTP binding C                               | NM_022157    | 1.03 | <b>1.37</b> |  |  |
| TMEM9   | transmembrane protein 9                                 | NM_016456    | 0.97 | <b>1.37</b> |  |  |



|               |                                                                             |               |      |             |  |  |
|---------------|-----------------------------------------------------------------------------|---------------|------|-------------|--|--|
| LGALS<br>8    | lectin,<br>galactoside-<br>binding,<br>soluble, 8                           | NM_2015<br>45 | 1.06 | <b>1.38</b> |  |  |
| FLJ202<br>55  | transmembran<br>e protein 104                                               | NM_0177<br>28 | 0.9  | <b>1.4</b>  |  |  |
| CLN3          | ceroid-<br>lipofuscinosis,<br>neuronal 3                                    | NM_0000<br>86 | 0.87 | <b>1.42</b> |  |  |
| LOC19<br>6463 | phospholipase<br>B domain<br>containing 2                                   | NM_1735<br>42 | 0.92 | <b>1.47</b> |  |  |
| LAMP<br>1     | lysosomal-<br>associated<br>membrane<br>protein 1                           | NM_0055<br>61 | 1.19 | <b>1.48</b> |  |  |
| LAPT<br>M4A   | lysosomal<br>protein<br>transmembran<br>e 4 alpha                           | NM_0147<br>13 | 0.42 | <b>1.58</b> |  |  |
| CLN5          | ceroid-<br>lipofuscinosis,<br>neuronal 5                                    | NM_0064<br>93 | 0.73 | <b>1.62</b> |  |  |
| Raptor        | regulatory<br>associated<br>protein of<br>MTOR,<br>complex 1                | NM_0207<br>61 | 0.87 | <b>1.62</b> |  |  |
| AOAH          | acyloxyacyl<br>hydrolase<br>(neutrophil)                                    | NM_0016<br>37 | 0.23 | <b>1.71</b> |  |  |
| FLJ206<br>25  | late<br>endosomal/lys<br>osomal<br>adaptor, MAPK<br>and MTOR<br>activator 1 | NM_0179<br>07 | 0.98 | <b>1.97</b> |  |  |

**Table S3:** List of genes significantly upregulated in *C. burnetii* WT compared to *C. burnetii pmrA::Tn* in both Beare *et al* (9) and this study. Experimentally verified effectors are indicated. From the unique cohort of genes in this study, those that have been previously identified as effectors are highlighted in bold.

| Genes specific to Beare <i>et al.</i> |                        | Genes common in both studies |                        | Genes specific to this study |                        |
|---------------------------------------|------------------------|------------------------------|------------------------|------------------------------|------------------------|
| CBU0062                               | Known effector(13)     | CBU0021                      | Known effector(14-16)  | CBU0222                      |                        |
| CBU0077                               | Known effector(17, 18) | CBU0041                      | Known effector(19, 20) | CBU0027                      |                        |
| CBU0113                               | Known effector(13, 20) | CBU0049                      |                        | CBU0086                      |                        |
| CBU0122                               | Known effector(9)      | CBU0084                      |                        | CBU0119                      |                        |
| CBU0210                               |                        | CBU0273                      |                        | CBU0339                      |                        |
| CBU0215                               |                        | CBU0343                      |                        | CBU0617                      |                        |
| CBU0306                               |                        | CBU0388                      | Known effector(15, 20) | CBU0618                      |                        |
| CBU0372                               | Known effector(20)     | CBU0409                      |                        | CBU0619                      |                        |
| CBU0439                               |                        | CBU0410                      | Known effector(19, 20) | CBU0731                      |                        |
| CBU0440                               |                        | CBU0436                      |                        | CBU0789                      |                        |
| CBU0624                               |                        | CBU0505                      |                        | CBU0793                      |                        |
| CBU0634                               |                        | CBU0508                      |                        | <b>CBU0794</b>               | Known effector(19, 20) |
| CBU0635                               | Known effector(17)     | CBU0560                      |                        | <b>CBU0881</b>               | Known effector(19, 20) |
| CBU0658                               |                        | CBU0665                      | Known effector(20, 21) | <b>CBU1198</b>               | Known effector(20)     |

|          |                        |         |                            |                 |                            |
|----------|------------------------|---------|----------------------------|-----------------|----------------------------|
| CBU0705  |                        | CBU0786 |                            | CBU1199         |                            |
| CBU0706  |                        | CBU0802 |                            | <b>CBU1213</b>  | Known effector(22)         |
| CBU0707  |                        | CBU0860 |                            | CBU1214         |                            |
| CBU0742  |                        | CBU1063 | Known effector(13)         | CBU1291         |                            |
| CBU0787  |                        | CBU1098 |                            | CBU1292         |                            |
| CBU0967  |                        | CBU1103 |                            | <b>CBU1409</b>  | Known effector(13)         |
| CBU0970  |                        | CBU1228 |                            | CBU1477         |                            |
| CBU1041  |                        | CBU1314 | Known effector(19, 20)     | CBU1478         |                            |
| CBU1152  |                        | CBU1366 |                            | CBU1493         |                            |
| CBU1209  | Predicted effector(13) | CBU1369 |                            | CBU1612         |                            |
| CBU1227  |                        | CBU1370 | Known effector(13)         | CBU1613         |                            |
| CBU1230  |                        | CBU1387 | Known effector(13)         | CBU1618         |                            |
| CBU1231  |                        | CBU1457 | Known effector(19, 20)     | CBU1647         |                            |
| CBU1279a |                        | CBU1530 | Known effector(9)          | CBU1701         | Predicted effector(13)     |
| CBU1529  |                        | CBU1543 | Known effector(19, 20)     | CBU1753         |                            |
| CBU1540  |                        | CBU1556 | Known effector(14, 19, 20) | <b>CBU1780</b>  | Known effector(16)         |
| CBU1621  |                        | CBU1614 | Known effector(9)          | <b>CBU1823</b>  | Known effector(17, 19, 20) |
| CBU1686  | Known effector(9, 15)  | CBU1622 |                            | <b>CBU1825</b>  | Known effector(17, 19, 20) |
| CBU1733  |                        | CBU1623 |                            | CBU1936         |                            |
| CBU1758b |                        | CBU1624 |                            | CBU2015a        |                            |
| CBU1824  |                        | CBU1625 |                            | <b>CBUA0014</b> | Known effector(23)         |
| CBU1948  |                        | CBU1626 |                            | <b>CBUA0016</b> | Known effector(23)         |

|         |                    |          |                            |  |  |
|---------|--------------------|----------|----------------------------|--|--|
| CBU2056 | Known effector(17) | CBU1627  |                            |  |  |
|         |                    | CBU1628  |                            |  |  |
|         |                    | CBU1629  |                            |  |  |
|         |                    | CBU1630  |                            |  |  |
|         |                    | CBU1631  |                            |  |  |
|         |                    | CBU1632  |                            |  |  |
|         |                    | CBU1633  |                            |  |  |
|         |                    | CBU1634  |                            |  |  |
|         |                    | CBU1634a | Known effector(13)         |  |  |
|         |                    | CBU1636  | Known effector(19, 20)     |  |  |
|         |                    | CBU1643  |                            |  |  |
|         |                    | CBU1644  |                            |  |  |
|         |                    | CBU1645  |                            |  |  |
|         |                    | CBU1646  |                            |  |  |
|         |                    | CBU1648  |                            |  |  |
|         |                    | CBU1649  |                            |  |  |
|         |                    | CBU1650  |                            |  |  |
|         |                    | CBU1651  |                            |  |  |
|         |                    | CBU1652  |                            |  |  |
|         |                    | CBU1685  | Known effector(9, 20)      |  |  |
|         |                    | CBU1751  | Known effector(19, 20)     |  |  |
|         |                    | CBU1752  | Known effector(9)          |  |  |
|         |                    | CBU1794  | Known effector(13)         |  |  |
|         |                    | CBU1863  | Known effector(14)         |  |  |
|         |                    | CBU2052  | Known effector(17, 19, 20) |  |  |
|         |                    | CBUA0015 | Known effector(23)         |  |  |

**Table S4:** List of strains, plasmids and oligonucleotides used in this study.

| Strains                                              | Properties                                                                                                                                                                    | Reference  |
|------------------------------------------------------|-------------------------------------------------------------------------------------------------------------------------------------------------------------------------------|------------|
| <i>C. burnetii</i> Nine Mile Phase II (NMII), RSA439 | Plaque purified <i>C. burnetii</i> Nine Mile phase II (NMII), strain RSA439, clone 4 (wild type)                                                                              | (24)       |
| <i>C. burnetii</i> NMII pBlaM-MceA                   | Wild type carrying pBlaM-MceA (Cm <sup>R</sup> )                                                                                                                              | (17)       |
| <i>C. burnetii</i> NMII pBlaM-Cig2                   | Wild type carrying pBlaM-Cig2 (Cm <sup>R</sup> )                                                                                                                              | (16)       |
| <i>C. burnetii</i> NMII P311-lux                     | Wild type carrying pTN7-Kan-311- <i>luxCDABE</i> -TT (Kan <sup>R</sup> )                                                                                                      | This study |
| <i>C. burnetii</i> NMII PicmW-lux                    | Wild type carrying pTN7-Kan-icmW- <i>luxCDABE</i> -TT (Kan <sup>R</sup> )                                                                                                     | This study |
| <i>C. burnetii</i> NMII Pcig2-lux                    | Wild type carrying pTN7-Kan-cig2- <i>luxCDABE</i> -TT (Kan <sup>R</sup> )                                                                                                     | This study |
| <i>C. burnetii</i> NMII <i>pmrA</i> ::Tn             | Transposon inserted at site 1177165 interrupting <i>pmrA</i> gene (Cm <sup>R</sup> )                                                                                          | (16)       |
| <i>C. burnetii</i> NMII <i>pmrA</i> ::Tn P311-lux    | <i>pmrA</i> transposon mutant carrying pTN7-Kan-311- <i>luxCDABE</i> -TT (Cm <sup>R</sup> Kan <sup>R</sup> )                                                                  | This study |
| <i>C. burnetii</i> NMII <i>pmrA</i> ::Tn PicmW-lux   | <i>pmrA</i> transposon mutant carrying pTN7-Kan-icmW- <i>luxCDABE</i> -TT (Cm <sup>R</sup> Kan <sup>R</sup> )                                                                 | This study |
| <i>C. burnetii</i> NMII <i>pmrA</i> ::Tn Pcig2-lux   | <i>pmrA</i> transposon mutant carrying pTN7-Kan-cig2- <i>luxCDABE</i> -TT (Cm <sup>R</sup> Kan <sup>R</sup> )                                                                 | This study |
|                                                      |                                                                                                                                                                               |            |
| <i>Escherichia coli</i> DH5 $\alpha$                 | F- $\Phi$ 80 <i>lacZ</i> $\Delta$ M15 $\Delta$ ( <i>lacZYA-argF</i> ) U169 <i>recA1 endA1 hsdR17</i> (rK-, mK+) <i>phoA supE44</i> $\lambda$ - <i>thi-1 gyrA96 relA1</i>      | Invitrogen |
| <i>E. coli</i> PIR1                                  | F- $\Delta$ <i>lac169 rpoS</i> (Am) <i>robA1 creC510 hsdR514 endA recA1 uidA</i> ( $\Delta$ Mlul):: <i>pir-116</i>                                                            | Invitrogen |
| <i>E. coli</i> PIR2                                  | F- $\Delta$ <i>lac169 rpoS</i> (Am) <i>robA1 creC510 hsdR514 endA recA1 uidA</i> ( $\Delta$ Mlul):: <i>pir</i>                                                                | Invitrogen |
|                                                      |                                                                                                                                                                               |            |
| Plasmids                                             | Properties                                                                                                                                                                    | Reference  |
| pBlaM-MceA                                           | <i>Coxiella</i> vector pJB-CAT-BlaM containing <i>mceA</i> ( <i>cbu0077</i> ) at the <i>Sall</i> site to create a BlaM fusion construct under the control of CBU1169 promoter | (17)       |
| pBlaM-Cig2                                           | <i>Coxiella</i> vector pJB-CAT-BlaM containing <i>cig2</i> ( <i>cbu0021</i> ) at the <i>Sall</i> site to create a BlaM fusion construct under the control of CBU1169 promoter | (16)       |
| pSpCas9(BB)-2A-Puro                                  | Addgene plasmid #62988                                                                                                                                                        | (25)       |

|                                             |                                                                                                                                                         |                                                   |
|---------------------------------------------|---------------------------------------------------------------------------------------------------------------------------------------------------------|---------------------------------------------------|
| (pX459) V2.0                                |                                                                                                                                                         |                                                   |
| pX459-LRP1-Exon-1                           | Contains guide RNA for LRP1 Exon 1 inserted into the <i>BbsI</i> site of pX459                                                                          | This study                                        |
| pX459-M6PR-Exon-2                           | Contains guide RNA for M6PR Exon 2 inserted into the <i>BbsI</i> site of pX459                                                                          | This study                                        |
| pX459-M6PR-Exon-3                           | Contains guide RNA for M6PR Exon 3 inserted into the <i>BbsI</i> site of pX459                                                                          | This study                                        |
| pX459-TPP1-Exon-2                           | Contains guide RNA for TPP1 Exon 2 inserted into the <i>BbsI</i> site of pX459                                                                          | This study                                        |
| pX459-TPP1-Exon-3                           | Contains guide RNA for TPP1 Exon 3 inserted into the <i>BbsI</i> site of pX459                                                                          | This study                                        |
| pMiniTN7T-Kan                               |                                                                                                                                                         | P. Beare                                          |
| pMiniTn7T-CAT:: <i>luxCDABE</i>             |                                                                                                                                                         | (9)                                               |
| pTN7-Kan- <i>luxCDABE</i> -TT               | Promoterless <i>luxCDABE</i> fragment cloned into pMiniTN7T-Kan via <i>KpnI</i> - <i>NheI</i> digest, with T0T1 terminator added via <i>KpnI</i> digest | This study                                        |
| pTN7-Kan-311- <i>luxCDABE</i> -TT           | <i>cbu0311</i> promoter cloned into pTN7-Kan- <i>luxCDABE</i> -TT                                                                                       | This study                                        |
| pTN7-Kan- <i>icmW</i> - <i>luxCDABE</i> -TT | <i>icmW</i> promoter cloned into pTN7-Kan- <i>luxCDABE</i> -TT                                                                                          | This study                                        |
| pTN7-Kan- <i>cig2</i> - <i>luxCDABE</i> -TT | <i>cig2</i> promoter cloned into pTN7-Kan- <i>luxCDABE</i> -TT                                                                                          | This study                                        |
| pTNS2:: <i>P1169</i> - <i>tnsABCD</i>       |                                                                                                                                                         | (26)                                              |
|                                             |                                                                                                                                                         |                                                   |
| <b>Oligonucleotide</b>                      | <b>Sequence</b>                                                                                                                                         | <b>Use/Reference</b>                              |
| OmpA-F                                      | CAGAGCCGGGAGTCAAGCT                                                                                                                                     | Quantification of <i>Coxiella</i> genomes in qPCR |
| OmpA-R                                      | CTGAGTAGGAGATTTGAATCGC                                                                                                                                  | Quantification of <i>Coxiella</i> genomes in qPCR |
|                                             |                                                                                                                                                         |                                                   |
| 18S-F                                       | CGGCTACCACATCCAAGGAA                                                                                                                                    | RT-qPCR                                           |
| 18S-R                                       | GCTGGAATTACCGCGGCT                                                                                                                                      | RT-qPCR                                           |
| Rab7A-F                                     | AGGAAGAAAGTGTTGCTGAAGG                                                                                                                                  | RT-qPCR                                           |
| Rab7A-R                                     | TGATGTCTTCCCRACTCCA                                                                                                                                     | RT-qPCR                                           |
| LRP1-F                                      | CTGCTCTCAGCTCTGGTCCG                                                                                                                                    | RT-qPCR                                           |
| LRP1-R                                      | CCAGCCCTTTGAGATACAGG                                                                                                                                    | RT-qPCR                                           |
| M6PR-F                                      | TGGCTACTCCAGTTTCCCAC                                                                                                                                    | RT-qPCR                                           |

|                    |                                                                  |                      |
|--------------------|------------------------------------------------------------------|----------------------|
| M6PR-R             | ATTCTCTCACTGCCACAGCC                                             | RT-qPCR              |
| LRP1-F (Exon 1)    | CACCGGCAACGGCGGGGTCAGCA                                          | CRISPR guide (27)    |
| LRP1-R (Exon 1)    | AAACTGCTGACCCCGCCGTTGCC                                          | CRISPR guide (27)    |
| M6PR-F (Exon 2)    | CACCGGAAAAAACTTGCGACTTGGT                                        | CRISPR guide         |
| M6PR-R (Exon 2)    | AAACACCAAGTCGCAAGTTTTTCC                                         | CRISPR guide         |
| M6PR-F (Exon 3)    | CACCGGAAGCTGGCAACCACACTTC                                        | CRISPR guide         |
| M6PR-R (Exon 3)    | AAACGAAGTGTGGTTGCCAGCTTCC                                        | CRISPR guide         |
| TPP1-F (Exon 2)    | CACCGGTCTCCGCTGGTTCGGGCTC                                        | CRISPR guide         |
| TPP1-R (Exon 2)    | AAACGAGCCCGACCAGCGGAGGACC                                        | CRISPR guide         |
| TPP1-F (Exon 3)    | CACCGGTGTGGAAAGACTCTCGGAGC                                       | CRISPR guide         |
| TPP1-R (Exon 3)    | AAACGCTCCGAGAGTCTTCCACACC                                        | CRISPR guide         |
| CBU0311 promoter-F | GTCGACGGTATCGATAAGCTAGCGGATCCCAG<br>TCTGATTATTAATTCAAACGGGTCAGGA | Luciferase reporters |
| CBU0311 promoter-R | AATAATGAATGAAATTTTTTTAGTCATATTTGCC<br>ATAAGGGCCCTCCTTCATGAGCGCAA | Luciferase reporters |
| Cig2 promoter-F    | GTCGACGGTATCGATAAGCTAGCGGATCCCAG<br>TCTCCTCATTTACAACAACTTCT      | Luciferase reporters |
| Cig2 promoter-R    | CCGTTAATAATGAATGAAATTTTTTTAGTCATAT<br>TTGCCATGTTTATCTCCAGCGCTT   | Luciferase reporters |
| IcmW promoter-F    | GTCGACGGTATCGATAAGCTAGCGGATCCCAG<br>TCTCATTGCTAGCACCCTTCC        | Luciferase reporters |
| IcmW promoter-R    | GTTAATAATGAATGAAATTTTTTTAGTCATATTT<br>GCCATGACTTCTCCGCTATTTAGGGT | Luciferase reporters |
| T0T1-F             | TAGGTACCCTTGACTCCTGTTGATAGATCCAG<br>TAATGAC                      | Luciferase reporters |
| T0T1-R             | ACGGTACCCTCCTAGCGGCGGATTTGTCCTAC                                 | Luciferase reporters |

**Dataset S1:** Summary of the siRNA primary screen outcome.

**Dataset S2:** Summary of the validation screen outcome of the 400 genes selected.

**Dataset S3:** Classification of the genes within the validation screen. Targets were sorted into three categories: high-confidence validation (4/4 – green or 3/4 – blue), moderate-confidence validation (2/4 – yellow) and did not validate (1/4 or 0/4 – white).

**Dataset S4-6:** RNA-seq raw data, including the log<sub>2</sub> fold change and padj values used to generate heat maps (Figure 4) for the 62 genes common to both Beare *et al* (9) and this study: WT H<sub>2</sub>O vs *pmrA*::Tn H<sub>2</sub>O (Dataset S4); WT AA vs WT H<sub>2</sub>O (Dataset S5); *pmrA*::Tn AA vs *pmrA*::Tn H<sub>2</sub>O (Dataset S6). (AA – Amino acids).



## References:

1. A. Birmingham *et al.*, Statistical methods for analysis of high-throughput RNA interference screens. *Nat Methods* **6**, 569-575 (2009).
2. P. D. Thomas *et al.*, PANTHER: a browsable database of gene products organized by biological function, using curated protein family and subfamily classification. *Nucleic Acids Res* **31**, 334-341 (2003).
3. E. A. Latomanski, P. Newton, C. A. Khoo, H. J. Newton, The Effector Cig57 Hijacks FCHO-Mediated Vesicular Trafficking to Facilitate Intracellular Replication of *Coxiella burnetii*. *PLoS Pathog* **12**, e1006101 (2016).
4. E. Martinez, F. Cantet, M. Bonazzi, Generation and multi-phenotypic high-content screening of *Coxiella burnetii* transposon mutants. *J Vis Exp*, e52851 (2015).
5. K. Jatou, O. Peter, D. Raoult, J. D. Tissot, G. Greub, Development of a high throughput PCR to detect *Coxiella burnetii* and its application in a diagnostic laboratory over a 7-year period. *New Microbes New Infect* **1**, 6-12 (2013).
6. P. Newton, E. A. Latomanski, H. J. Newton, Applying Fluorescence Resonance Energy Transfer (FRET) to Examine Effector Translocation Efficiency by *Coxiella burnetii* during siRNA Silencing. *J Vis Exp* (2016).
7. N. L. Bray, H. Pimentel, P. Melsted, L. Pachter, Near-optimal probabilistic RNA-seq quantification. *Nat Biotechnol* **34**, 525-527 (2016).
8. S. Anders, W. Huber, Differential expression analysis for sequence count data. *Genome Biol* **11**, R106 (2010).
9. P. A. Beare *et al.*, Essential Role for the Response Regulator PmrA in *Coxiella burnetii* Type 4B Secretion and Colonization of Mammalian Host Cells. *J Bacteriol* **196**, 1925-1940 (2014).
10. J. C. Oliveros (2007-2015) Venny. An interactive tool for comparing lists with Venn's Diagrams.
11. A. I. Saeed *et al.*, TM4 microarray software suite. *Methods Enzymol* **411**, 134-193 (2006).
12. M. Thelen, D. Winter, T. Bräulke, V. Gieselmann, SILAC-Based Comparative Proteomic Analysis of Lysosomes from Mammalian Cells Using LC-MS/MS. *Methods Mol Biol* **1594**, 1-18 (2017).
13. Z. Lifshitz *et al.*, Identification of novel *Coxiella burnetii* Icm/Dot effectors and genetic analysis of their involvement in modulating a mitogen-activated protein kinase pathway. *Infect Immun* **82**, 3740-3752 (2014).
14. C. L. Larson *et al.*, *Coxiella burnetii* effector proteins that localize to the parasitophorous vacuole membrane promote intracellular replication. *Infect Immun* (2014).
15. Z. Lifshitz *et al.*, Computational modeling and experimental validation of the *Legionella* and *Coxiella* virulence-related type-IVB secretion signal. *Proc Natl Acad Sci U S A* **110**, E707-715 (2013).
16. H. J. Newton *et al.*, A screen of *Coxiella burnetii* mutants reveals important roles for Dot/Icm effectors and host autophagy in vacuole biogenesis. *PLoS Pathog* **10**, e1004286 (2014).

17. K. L. Carey, H. J. Newton, A. Luhrmann, C. R. Roy, The *Coxiella burnetii* Dot/Icm system delivers a unique repertoire of type IV effectors into host cells and is required for intracellular replication. *PLoS Pathog* **7**, e1002056 (2011).
18. L. F. Fielden *et al.*, A Farnesylated *Coxiella burnetii* Effector Forms a Multimeric Complex at the Mitochondrial Outer Membrane during Infection. *Infect Immun* **85** (2017).
19. C. Chen *et al.*, Large-scale identification and translocation of type IV secretion substrates by *Coxiella burnetii*. *Proc Natl Acad Sci U S A* **107**, 21755-21760 (2010).
20. M. M. Weber *et al.*, Identification of *Coxiella burnetii* type IV secretion substrates required for intracellular replication and *Coxiella*-containing vacuole formation. *J Bacteriol* **195**, 3914-3924 (2013).
21. C. L. Larson, P. A. Beare, D. Howe, R. A. Heinzen, *Coxiella burnetii* effector protein subverts clathrin-mediated vesicular trafficking for pathogen vacuole biogenesis. *Proc Natl Acad Sci U S A* **110**, E4770-4779 (2013).
22. D. E. Voth *et al.*, The *Coxiella burnetii* ankyrin repeat domain-containing protein family is heterogeneous, with C-terminal truncations that influence Dot/Icm-mediated secretion. *J Bacteriol* **191**, 4232-4242 (2009).
23. D. E. Voth *et al.*, The *Coxiella burnetii* cryptic plasmid is enriched in genes encoding type IV secretion system substrates. *J Bacteriol* **193**, 1493-1503 (2011).
24. P. A. Beare *et al.*, Comparative genomics reveal extensive transposon-mediated genomic plasticity and diversity among potential effector proteins within the genus *Coxiella*. *Infect Immun* **77**, 642-656 (2009).
25. F. A. Ran *et al.*, Genome engineering using the CRISPR-Cas9 system. *Nat Protoc* **8**, 2281-2308 (2013).
26. P. A. Beare, C. L. Larson, S. D. Gilk, R. A. Heinzen, Two systems for targeted gene deletion in *Coxiella burnetii*. *Appl Environ Microbiol* **78**, 4580-4589 (2012).
27. L. Luo *et al.*, TLR Crosstalk Activates LRP1 to Recruit Rab8a and PI3Kgamma for Suppression of Inflammatory Responses. *Cell Rep* **24**, 3033-3044 (2018).
